# Supplementary material for: Phase engineering of seamless heterophase homojunctions with co-existing 3R and 2H phases in WS2 monolayers
Source: Royal Society of Chemistry journal article supplement (doi:10.1039/c7nr08303c), 2018-01-01
Supplement: c7nr08303c1.pdf [file c7nr08303c1.pdf]

## SUPPLEMENTARY INFORMATION

### Phase engineering of seamless heterophase homojunctions with co-existing 3R and 2H phases in WS<sub>2</sub> monolayers

Pawan Kumar<sup>1</sup>, Navneet Chandra Verma<sup>2</sup>, Natasha Goyal<sup>3</sup>, Jayeeta Biswas<sup>3</sup>, Saurabh Lodha<sup>3</sup>, Chayan K. Nandi<sup>2</sup> and B. Viswanath<sup>1\*</sup>

<sup>1</sup>School of Engineering, Indian Institute of Technology Mandi, Kamand, Himachal Pradesh-175005, India.

<sup>2</sup>School of Basic Sciences, Indian Institute of Technology Mandi, Kamand, Himachal Pradesh-175005, India.

<sup>3</sup>Department of Electrical Engineering, Indian Institute of Technology Bombay, Mumbai-400076, India.

#### Sample preparation and in-situ extension of growth condition:

Typically, we have taken as mentioned amount of WO<sub>3</sub> nanorod and ultra-sonicated with deionized water that sparsely deposited on SiO<sub>2</sub>/Si substrate and placed it at center (heating zone 1) of quartz tube furnace. Before the deposition of WO<sub>3</sub> nanorod, SiO<sub>2</sub>/Si substrate was cleaned by ultrasonication with Acetone, Isopropyl alcohol followed by Piranha solution (3:1 ratio of H<sub>2</sub>SO<sub>4</sub> & H<sub>2</sub>O<sub>2</sub>) treatment for 3 hours. A boat containing ~300 mg Sulfur powder has been placed on heating zone 2 of same tube furnace such that the sulfurization of WO<sub>3</sub> nanorod can be achieved near growth temperature. We have adopted two different ramping rates of 20°C/min. up to 500°C and 10°C/min. to reach the final reaction temperature. Generally, heterogeneous co-existing phase of monolayer WS<sub>2</sub> grown in 5-10 minutes after reaching as mentioned final reaction temperature. On extending this growth duration to 30 minutes by maintaining similar growth parameters, dynamic reconstructions started between newly evolved point defects and continuous nucleation of WS<sub>2</sub> growth. After 30 minutes, monolayer WS<sub>2</sub> with large amount of clustered point defects (voids) in the region of 3R phase appeared due to high energy metastable structure.

### **Structure of 2H and 3R phases in WS<sub>2</sub>:**

WS<sub>2</sub> has mainly three allotropes in its structure which are 1T, 2H and 3R depending on coordination of S-atom with W-atoms as well as stacking order of its layers. Among the three polytypes, 2H and 3R having commonly trigonal prismatic coordination while 1T has octahedral coordination. Trigonal prismatic coordination in 2H have stacking order in form of AbA BaB AbA while in case of 3R phase, it is like AbA BcB CaC AbA. Formation of two polytypes next to each other is trivial with coexisting phase materials and stabilizing themselves resulting from the thermodynamic favored conditions as mentioned in table ST1. Strain energy minimization stabilizes co-existing phases at room temperature and has been explored here upto their decomposition states using in-situ PL measurements.

Physical and chemical properties in bulk polytype of 2H and 3R are almost equal except it's slightly changes band structure. 2H and 3R, both form of polytypes shows semiconducting in nature due to similar coordination geometry. This causes slight changes in PL position with slightly reduced intensity. While the metallic 1T phase known to show complete PL quenching, the observed 3R phase shows considerable intensity due to its semiconducting nature.

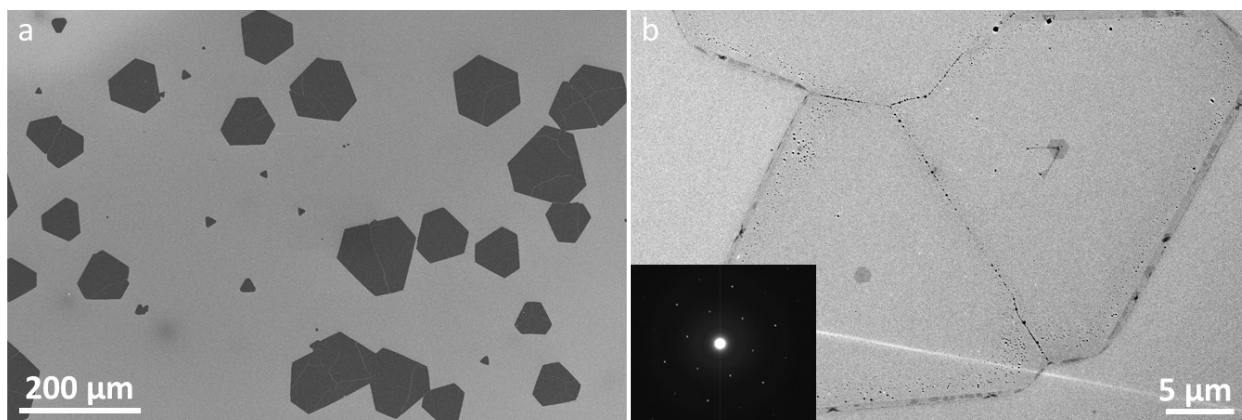

Figure S0: Electron microscopic view of monolayer  $WS_2$ ; (a) FESEM image of large size CVD grown monolayer  $WS_2$  having no contaminants and corresponded similar (b) TEM image for as-grown monolayer  $WS_2$  directly on  $Si_3N_4$  grid along with attached (inset) SAED pattern reflecting crystalline monolayer formation.

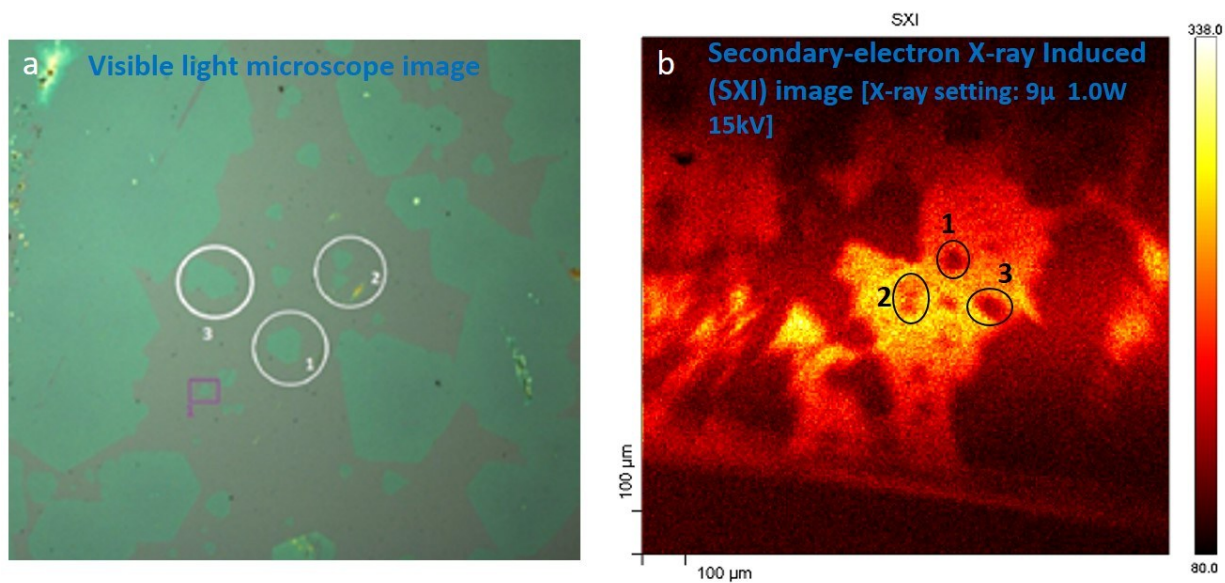

Figure S1: (a) Visible light microscope image as shown is used to locate individual flake for further XPS measurement, (b) SXI imaging has been performed to locate exact position of corresponding flakes for XPS measurement.

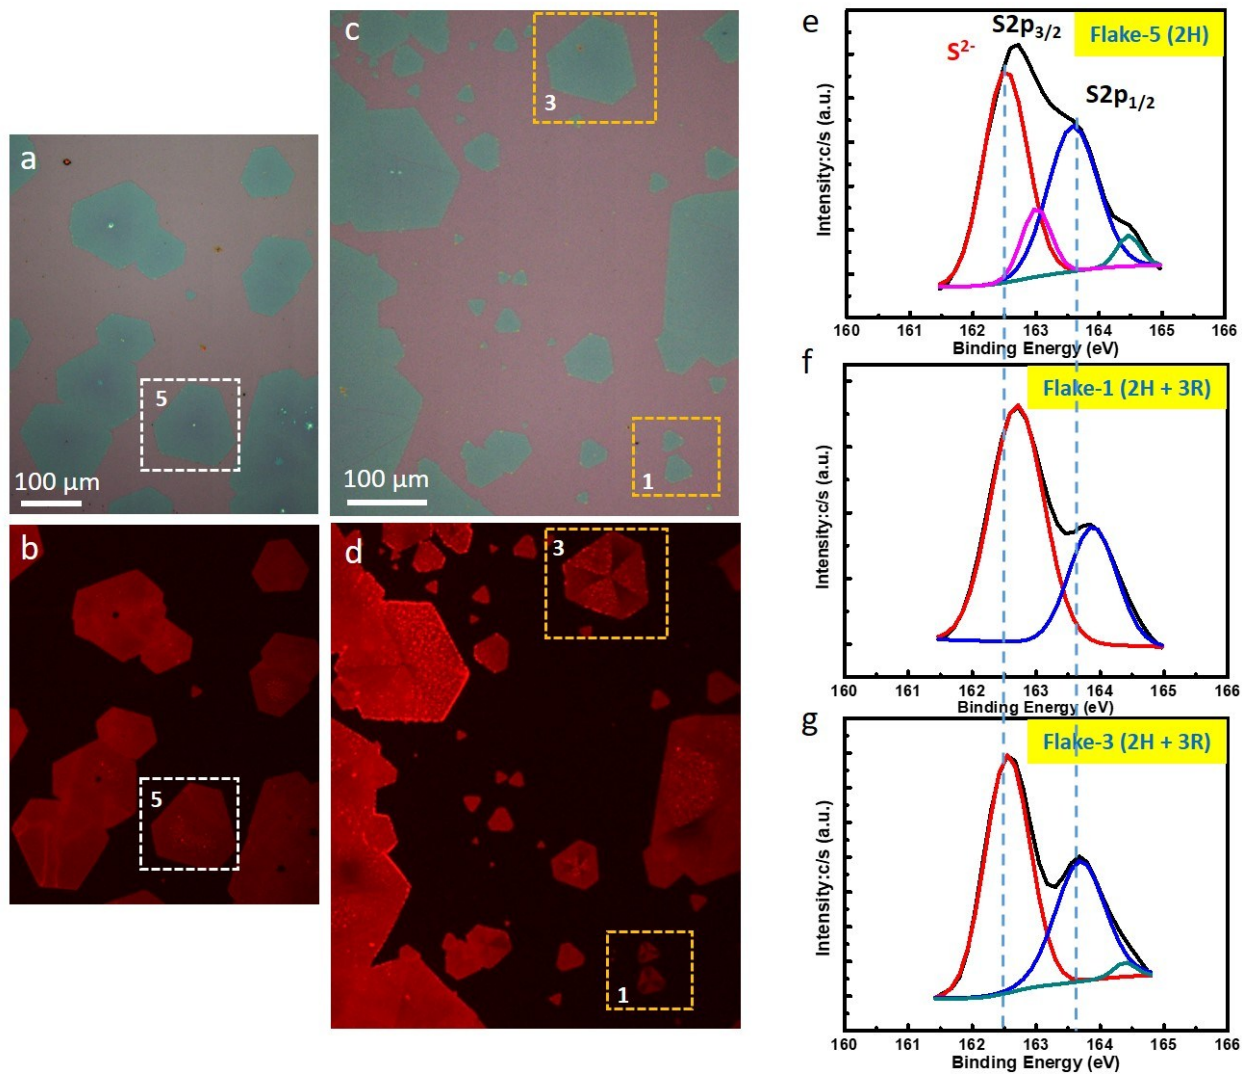

Figure S2: XPS measurement across the planar and hetero-phase formation in monolayer for corresponding three different flakes showing S2p orbital binding energy.

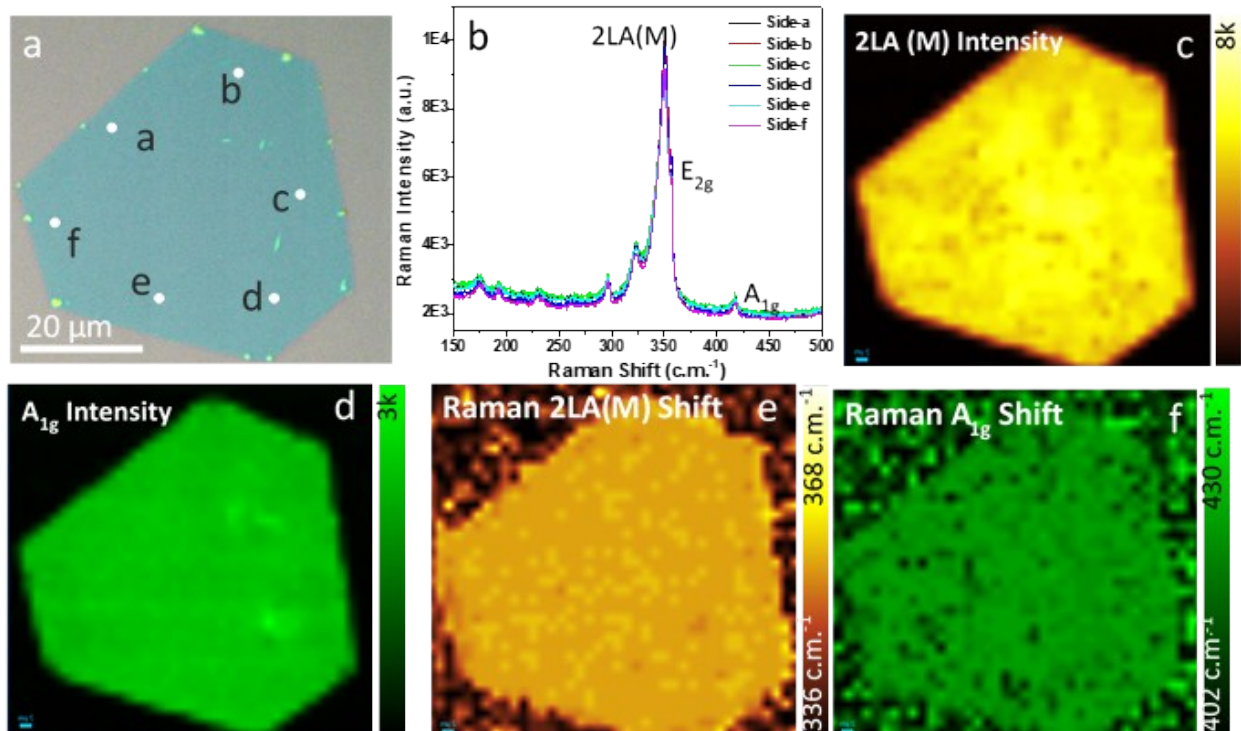

Figure S3: Structural phase heterogeneity (2H and 3R) in monolayer  $\text{WS}_2$  (flake 2) forming alternate seamless homojunction; (a) VLM image of monodomain single layer  $\text{WS}_2$  which shows no optically visible phase contrast. (b) Raman point spectrum for each alternate phase forming seamless homojunction along with Raman intensity mapped images for both dominant vibrational modes, (c) 2LA and (d)  $A_{1g}$  and Raman position mapped images (e) 2LA(M) (f)  $A_{1g}$  respectively having no any distinguished contrast within truncated hexagonal monolayer  $\text{WS}_2$  confirming very small defect concentration leading to formation of heterophase (scale bar is same for all).

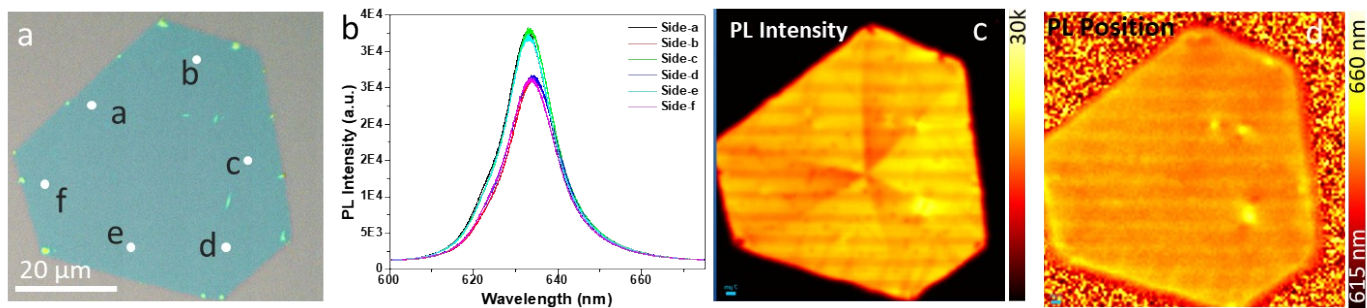

Figure S4: Structural phase heterogeneity “2H and 3R” in monolayer WS<sub>2</sub> (flake 2) forming alternate seamless homojunction; (a) VLM image of monodomain single layer WS<sub>2</sub> which shows no optically visible phase contrast and corresponding (b) PL point spectrum for each alternate phase forming seamless homojunction in between with different luminescence behavior, (c) PL intensity mapping as well as (d) PL position mapping corresponded to as shown VLM image as in figure a (scale bar is same for all).

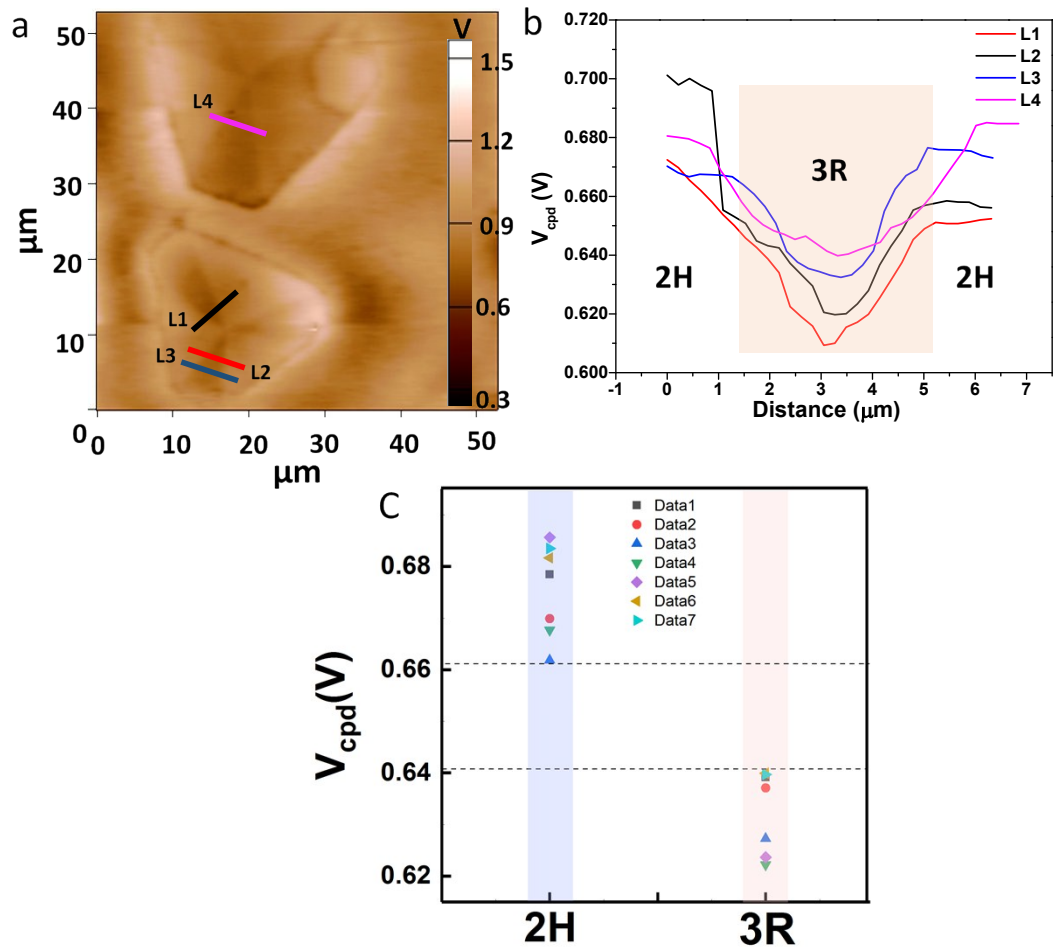

Figure S5: (a-b) Different line profile analysis to confirm the energy differences across interface of homojunction formed by 2H-3R WS<sub>2</sub>. (c) Plots showing varying Contact potential difference ( $V_{cpd}$ ) values for several data points on the 2H and 3R phases of WS<sub>2</sub> flake for as measurements done. The  $V_{cpd}$  value difference of ~40 mV is constantly present between the two phases.



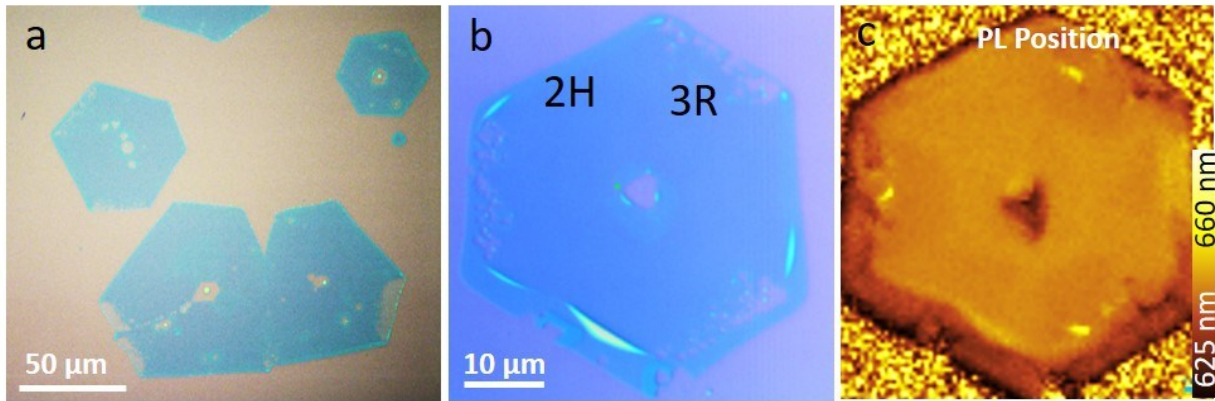

Figure S6: Defect formation and favorable enriched defects nucleated facet region shown in atomically thin heterophase 2D monolayer WS<sub>2</sub>.

| Reaction Parameters                          |                                                                                         |                                                                  |                                  | Concentration |                                        | Resultant Product        |                         |                         |  |
|----------------------------------------------|-----------------------------------------------------------------------------------------|------------------------------------------------------------------|----------------------------------|---------------|----------------------------------------|--------------------------|-------------------------|-------------------------|--|
| Temp. : Zone 1<br>(WO <sub>3</sub> ) ~ 850°C | Temp. : Zone 2<br>(S) ~ 200-250°C<br><br>* S inserted when zone1 temp. reached to 700°C | Gaseous environment :<br>Ar+H <sub>2</sub> (95+5%)<br>~ 50 sccm. | Growth duration : ~<br>5-10 min. | Sulfur (S)    | WO <sub>3</sub><br>Nanorod<br>(1µg/ml) | Monolayer<br>Domain Size | Monolayer Heterogeneity |                         |  |
|                                              |                                                                                         |                                                                  |                                  |               |                                        |                          | Growth Temp.<br>~ 850°C | Growth Temp.<br>~ 900°C |  |
|                                              |                                                                                         |                                                                  |                                  |               |                                        | Homogeneous              | Heterogeneous           |                         |  |
|                                              |                                                                                         |                                                                  |                                  |               |                                        | NA                       |                         |                         |  |
|                                              |                                                                                         |                                                                  |                                  |               |                                        | Could not analyzed       |                         |                         |  |
|                                              |                                                                                         |                                                                  |                                  |               |                                        | Yes                      | Yes                     |                         |  |
|                                              |                                                                                         | Yes                                                              | Yes                              |               |                                        |                          |                         |                         |  |
|                                              |                                                                                         | Yes                                                              | Yes                              |               |                                        |                          |                         |                         |  |

Table ST1: Optimized parameters for controlled growth of heterogeneous structure of monolayer WS<sub>2</sub> forming in single domain with large lateral dimension.
